# Supplementary material for: Interleukin 1 receptor antagonist (IL1RN) gene variants predict radiographic severity of knee osteoarthritis and risk of incident disease
Source: PubMed Central journal article supplement (PMC7034355; doi:10.1136/annrheumdis-2019-216055), 2019-12-18
Supplement: annrheumdis-2019-216055supp002.pdf [file annrheumdis-2019-216055supp002.pdf]

**Supplementary Table 1.** Linkage disequilibrium parameters  $D'$  and  $r^2$  for *IL1RN* single nucleotide polymorphisms (SNPs) rs419598, rs315952 and rs9005 for all three cohorts: New York University School of Medicine (NYU), Genetics of Generalized Osteoarthritis (GOGO) and Osteoarthritis Initiative (OAI).

| SNP pair            | $D' / r^2$  |             |             |
|---------------------|-------------|-------------|-------------|
|                     | NYU         | GOGO        | OAI         |
| rs419598 / rs315952 | 0.62 / 0.21 | 0.72 / 0.22 | 0.57 / 0.22 |
| rs419598 / rs9005   | 0.81 / 0.61 | 0.86 / 0.75 | 0.72 / 0.67 |
| rs35952 / rs9005    | 0.68 / 0.31 | 0.99 / 0.35 | 0.82 / 0.35 |

**Supplementary Table 2: *IL1RN* haplotype TTG association with mJSW and radiographic severity in combined (NYU, GOGO, and OAI) cohorts.**

| <b>Panel A: <i>IL1RN</i> SNP All Combined (n=1066)</b> | <b>mJSW: beta (<math>\pm</math> SE), p value, FDR</b> |
|--------------------------------------------------------|-------------------------------------------------------|
| <b>TTG-0</b> vs. TTG-1 haplotype                       | -0.35 (0.11), p=0.001, FDR=0.004                      |
| <b>TTG-0</b> vs. TTG-2 haplotype                       | -0.45 (0.14), p=0.001, FDR=0.007                      |
| <b>Panel B: <i>IL1RN</i> SNP All Combined (n=1066)</b> | <b>KL severity: OR (95% CI), p value, FDR</b>         |
| <b>TTG-0</b> vs. TTG-1 haplotype                       | 1.53 (1.12-2.08), p=0.008, FDR=0.017                  |
| <b>TTG-0</b> vs. TTG-2 haplotype                       | 1.69 (1.27-2.24), p=0.000, FDR=0.001                  |

In panel A, an association of medial joint space width (mJSW) in millimeters (mm) with *IL1RN* haplotypes were studied by comparing the indicated haplotype (TTG-0) with TTG-1 or TTG-2 using linear regression analysis. In panel B, Patients were classified by radiographic severity of knee OA by stratifying the KL scores to compare KL 1 or 2 versus KL 3 or 4. Odds ratios (OR) of KL vs. *IL1RN* haplotype also shows the association of Kellgren-Lawrence (KL) score with *IL1RN* haplotype.

**Supplementary Table 3: Regression analysis of *IL1RN* haplotype (TTG) with radiographic medial joint space width (mJSW) in three cohorts of symptomatic knee OA patients.**

|                                                                                                                                                                                                                                                                                                                                                                                                                                                           | <b>ALL (n=1022)<br/>Beta (SE); P=value</b> |
|-----------------------------------------------------------------------------------------------------------------------------------------------------------------------------------------------------------------------------------------------------------------------------------------------------------------------------------------------------------------------------------------------------------------------------------------------------------|--------------------------------------------|
| <b>mJSW (mm) (Baseline), TTG Haplotype (0 vs. 1/2)</b>                                                                                                                                                                                                                                                                                                                                                                                                    |                                            |
| crude                                                                                                                                                                                                                                                                                                                                                                                                                                                     | -0.35 (0.11); 0.001                        |
| adjusted for age, sex                                                                                                                                                                                                                                                                                                                                                                                                                                     | -0.35 (0.10); 0.001                        |
| adjusted for age, sex, BMI                                                                                                                                                                                                                                                                                                                                                                                                                                | -0.36 (0.10); 0.001                        |
| <b>mJSW (mm) (Baseline), TTG Haplotype (0 vs 2)</b>                                                                                                                                                                                                                                                                                                                                                                                                       |                                            |
| crude                                                                                                                                                                                                                                                                                                                                                                                                                                                     | -0.45 (0.14); 0.001                        |
| adjusted for age, sex                                                                                                                                                                                                                                                                                                                                                                                                                                     | -0.40 (0.14); 0.004                        |
| adjusted for age, sex, BMI                                                                                                                                                                                                                                                                                                                                                                                                                                | -0.40 (0.14); 0.003                        |
| <p>Medial joint space width (mJSW) in millimeters comparing the indicated haplotype (TTG-0) with TTG-1 or TTG-2. Haplotypes TTG-0 or TTG-1 or TTG-2, respectively, represent carriers of 0 or 1 or 2 copies of <i>IL1RN</i> haplotype produced using 3 <i>IL1RN</i> SNPs (rs419598, rs315952 and rs9005). Linear regression was performed unadjusted, adjusted for age and sex, as well as adjusted for age, sex, and body mass index (BMI) together.</p> |                                            |

**Supplementary Table 4: Association of *IL1RN* haplotype (TTG) in male and female with radiographic signal knee medial joint space width (mJSW) in combined (NYU, GOGO, and OAI) cohorts of symptomatic knee OA patients.**

|                                                                                                                                                                                                                                                                                                                                                                                                                                                         | Beta (SE), p-value  |
|---------------------------------------------------------------------------------------------------------------------------------------------------------------------------------------------------------------------------------------------------------------------------------------------------------------------------------------------------------------------------------------------------------------------------------------------------------|---------------------|
| <b>mJSW (mm) (Baseline), TTG Haplotype (0 vs 1/2) – Male</b>                                                                                                                                                                                                                                                                                                                                                                                            | <b>ALL (n=355)</b>  |
| Crude                                                                                                                                                                                                                                                                                                                                                                                                                                                   | -0.48 (0.20), 0.018 |
| adjusted for age, sex                                                                                                                                                                                                                                                                                                                                                                                                                                   | -0.54 (0.19), 0.006 |
| adjusted for age, sex, BMI                                                                                                                                                                                                                                                                                                                                                                                                                              | -0.50 (0.19), 0.009 |
| <b>mJSW (mm) (Baseline), TTG Haplotype (0 vs 2) – Male</b>                                                                                                                                                                                                                                                                                                                                                                                              | <b>ALL (n=164)</b>  |
| Crude                                                                                                                                                                                                                                                                                                                                                                                                                                                   | -0.58 (0.26), 0.027 |
| adjusted for age, sex                                                                                                                                                                                                                                                                                                                                                                                                                                   | -0.51 (0.25), 0.042 |
| adjusted for age, sex, BMI                                                                                                                                                                                                                                                                                                                                                                                                                              | -0.49 (0.24), 0.047 |
| <b>mJSW (mm) (Baseline), TTG Haplotype (0 vs 1/2) – Female</b>                                                                                                                                                                                                                                                                                                                                                                                          | <b>ALL (n=667)</b>  |
| Crude                                                                                                                                                                                                                                                                                                                                                                                                                                                   | -0.28 (0.12), 0.021 |
| adjusted for age, sex                                                                                                                                                                                                                                                                                                                                                                                                                                   | -0.27 (0.12), 0.025 |
| adjusted for age, sex, BMI                                                                                                                                                                                                                                                                                                                                                                                                                              | -0.28 (0.12), 0.023 |
| <b>mJSW (mm) (Baseline), TTG Haplotype (0 vs 2) – Female</b>                                                                                                                                                                                                                                                                                                                                                                                            | <b>ALL (n=317)</b>  |
| Crude                                                                                                                                                                                                                                                                                                                                                                                                                                                   | -0.38 (0.16), 0.018 |
| adjusted for age, sex                                                                                                                                                                                                                                                                                                                                                                                                                                   | -0.34 (0.16), 0.033 |
| adjusted for age, sex, BMI                                                                                                                                                                                                                                                                                                                                                                                                                              | -0.34 (0.16), 0.034 |
| Medial joint space width (mJSW) in millimeters comparing the indicated haplotype (TTG-0) with TTG-1 or TTG-2. Haplotypes TTG-0 or TTG-1 or TTG-2, respectively, represent carriers of 0 or 1 or 2 copies of <i>IL1RN</i> haplotype produced using 3 <i>IL1RN</i> SNPs (rs419598, rs315952 and rs9005). A linear regression model was performed and adjusted for age and sex, as well as for age, sex, and body mass index (BMI) in the combined cohort. |                     |

**Supplementary Table 5: Association of *IL1RN* haplotype (TTG) in Blacks with radiographic signal knee medial joint space width (mJSW) in combined (NYU and OAI) cohorts of symptomatic knee OA patients.**

|                                                                                                                                                                                                                                                                                                                                                                                                                                                                 | Beta (SE), p-value  |
|-----------------------------------------------------------------------------------------------------------------------------------------------------------------------------------------------------------------------------------------------------------------------------------------------------------------------------------------------------------------------------------------------------------------------------------------------------------------|---------------------|
| <b>mJSW (mm) (Baseline), TTG Haplotype (0 vs 1/2)</b>                                                                                                                                                                                                                                                                                                                                                                                                           | <b>ALL (n=82)</b>   |
| Crude                                                                                                                                                                                                                                                                                                                                                                                                                                                           | -0.48 (0.34), 0.165 |
| adjusted for age, sex                                                                                                                                                                                                                                                                                                                                                                                                                                           | -0.46 (0.34), 0.183 |
| adjusted for age, sex, BMI                                                                                                                                                                                                                                                                                                                                                                                                                                      | -0.44 (0.34), 0.201 |
| <b>mJSW (mm) (Baseline), TTG Haplotype (0 vs 2)</b>                                                                                                                                                                                                                                                                                                                                                                                                             | <b>ALL (n=45)</b>   |
| Crude                                                                                                                                                                                                                                                                                                                                                                                                                                                           | -0.77 (0.44), 0.091 |
| adjusted for age, sex                                                                                                                                                                                                                                                                                                                                                                                                                                           | -0.79 (0.44), 0.080 |
| adjusted for age, sex, BMI                                                                                                                                                                                                                                                                                                                                                                                                                                      | -0.82 (0.45), 0.072 |
| <p>Medial joint space width (mJSW) in millimeters comparing the indicated haplotype (TTG-0) with TTG-1 or TTG-2. Haplotypes TTG-0 or TTG-1 or TTG-2, respectively, represent carriers of 0 or 1 or 2 copies of <i>IL1RN</i> haplotype produced using 3 <i>IL1RN</i> SNPs (rs419598, rs315952 and rs9005). A linear regression model was performed and adjusted for age and sex, as well as for age, sex, and body mass index (BMI), in the combined cohort.</p> |                     |

**Supplementary Table 6: Association of *IL1RN* haplotype (TTG) in Hispanic and non-Hispanic with baseline radiographic signal knee medial joint space width (mJSW) in combined (NYU and OAI) cohorts of symptomatic knee OA patients.**

| <b>Hispanic</b>                     | <b>Beta (SE); P value</b> |
|-------------------------------------|---------------------------|
| mJSW (mm), TTG Haplotype (0 vs 1/2) | ALL (n=347)               |
| crude                               | -0.39 (0.24); 0.106       |
| adjusted for age, sex               | -0.33 (0.24); 0.160       |
| adjusted for age, sex, BMI          | -0.38 (0.24); 0.108       |
| mJSW (mm), TTG Haplotype (0 vs 2)   | ALL (n=122)               |
| crude                               | -0.56 (0.29); 0.052       |
| adjusted for age, sex               | -0.37 (0.27); 0.176       |
| adjusted for age, sex, BMI          | -0.42 (0.27); 0.126       |
| <b>Non-Hispanic</b>                 | <b>Beta (SE); P value</b> |
| mJSW (mm), TTG Haplotype (0 vs 1/2) | ALL (n=587)               |
| crude                               | -0.33 (0.17); 0.057       |
| adjusted for age, sex               | -0.29 (0.17); 0.088       |
| adjusted for age, sex, BMI          | -0.31 (0.17); 0.066       |
| mJSW (mm), TTG Haplotype (0 vs 2)   | ALL (n=211)               |
| crude                               | -0.63 (0.22); 0.005       |
| adjusted for age, sex               | -0.49 (0.21); 0.022       |
| adjusted for age, sex, BMI          | -0.49 (0.21); 0.021       |

Medial joint space width (mJSW) in millimeters comparing the indicated haplotype (TTG-0) with TTG-1 or TTG-2. Haplotypes TTG-0 or TTG-1 or TTG-2, respectively, represent carriers of 0 or 1 or 2 copies of *IL1RN* haplotype produced using 3 *IL1RN* SNPs (rs419598, rs315952 and rs9005). A linear regression model was performed and adjusted for age and sex, as well as for age, sex, and body mass index (BMI), in the combined cohort.

**Supplementary Table 7: The *IL1RN* risk haplotype TTG (1 or 2) associated with decreased soluble IL-1Ra levels in chondrocytes**

|                               | Unstimulated, mean ( $\pm$ SD) |                     |                  | IL-1 induced, mean ( $\pm$ SD) |                     |                  |
|-------------------------------|--------------------------------|---------------------|------------------|--------------------------------|---------------------|------------------|
|                               | Extra-cellular (s)             | Intra-cellular (ic) | Ratio (s vs. ic) | Extra-cellular (s)             | Intra-cellular (ic) | Ratio (s vs. ic) |
| <b><i>IL1RN</i> haplotype</b> |                                |                     |                  |                                |                     |                  |
| TTG-1,2 (n=15)                | 5.05 ( $\pm$ 8.1)              | 7.93 ( $\pm$ 14.9)  | 1 : 1.2          | 6.19 ( $\pm$ 7.1)              | 33.71 ( $\pm$ 22.0) | 1 : 5.4          |
| TTG-0 (n=14)                  | 1.46 ( $\pm$ 2.2)              | 1.41 ( $\pm$ 2.5)   | 1 : 1            | 10.36 ( $\pm$ 11.9)            | 12.28 ( $\pm$ 8.4)  | 1 : 1.2          |
| <b>P-value</b>                |                                |                     |                  |                                |                     |                  |
| TTG-1, 2 vs. TTG-0            | <b>0.05</b>                    | 0.06                | —                | 0.22                           | 0.07                | —                |
| TTG-1,2 – Con vs. IL-1        | —                              | —                   | —                | 0.62                           | <b>0.04</b>         | —                |
| TTG-0 – Con vs. IL-1          | —                              | —                   | —                | <b>0.01</b>                    | <b>0.0005</b>       | —                |

We analyzed total cell lysate for extracellular and cell-associated IL-1Ra protein expression in primary chondrocytes by ELISA. Haplotypes TTG-0 or TTG-1 or TTG-2, respectively, represent carriers of 0 or 1 or 2 copies of *IL1RN* haplotype produced using 3 *IL1RN* SNPs (rs419598, rs315952 and rs9005). Chondrocytes with *IL1RN* TTG-1/2 haplotype produced significantly lower levels of soluble IL1Ra than TTG-0 carriers in both spontaneous conditions and following 24h IL-1 $\beta$  induction. The data represent mean ( $\pm$ SD), for n=15 individuals with TTG-1/2 and n=14 individuals with TTG-0. Mann Whitney U test was used to analyze difference between groups.
